# Supplementary material for: Atrial-Specific KCNQ1 Channelopathy Drives Arrhythmogenesis and Unmasks Amiodarone Proarrhythmia in a Human iPSC Model
Source: Research Square preprint supplement (doi:10.21203/rs.3.rs-8022975/v1), 2025-12-11
Supplement: Supplementary file 1 [file 82a4d2bc8e0c6df35db6962d.docx]

**Table S3. SeqTences of primers Tsed for gene amplification.**

| **Genes** | **Forward** | **Reverse** |
| --- | --- | --- |
| KCNQ1 | CTACCAGATGGAGCCCCTAAG | AGGTACTCCAGATTCCCTCAGT |
| SOX2 | ACCAGCTCGCAGACCTACAT | CCCCCTGAACCTGAAACATA |
| KLF4 | CCCACACAGGTGAGAAACCT | CCCCCTGAACCTGAAACATA |
| SV40LT | TGGGGAGAAGAACATGGAAG | AGGAACTGCTTCCTTCACGA |
| oriP | TTCCACGAGGGTAGTGAACC | TTCCACGAGGGTAGTGAACC |
| EBNA-1 | ATCGTCAAAGCTGCACACAG | CCCAGGAGTCCCAGTAGTCA |
| miR-302/367 | TTTCCAAAATGTCGTAATAACCCCG | CTCCCAAAGAGTCCTGTTCTGTCCT |
| GAPDH | GTGGACCTGACCTGCCGTCT | GGAGGAGTGGGTGTCGCTGT |
| endoOCT4 | CCTCACTTCACTGCACTGTA | CAGGTTTTCTTTCCCTAGCT |
| endoSOX2 | CCCAGCAGACTTCACATGT | CCTCCCATTTCCCTCGTTTT |
| NANOG | AAGGTCCCGGTCAAGAAACAG | CTTCTGCGTCACACCATTGC |
| NR2F2 | TCATGGGTATCGAGAACATTTGC | TTCAACACAAACAGCTCGCTC |
| MYH6 | CCAGACGGCACCGAAGAT | TGACATACTCGTTGCCCACTTT |
| MYL2V | TTGGGCGAGTGAACGTGAAAA | CCGAACGTAATCAGCCTTCAG |
| IRX4 | TTCCGTTCTGAAGCGTGGTC | TGAAGCAGGCAATTATTGGTGT |
| GAPDH | GGAGCGAGATCCCTCCAAAAT | GGCTGTTGTCATACTTCTCATGG |
