# Supplementary material for: Atrial-Specific KCNQ1 Channelopathy Drives Arrhythmogenesis and Unmasks Amiodarone Proarrhythmia in a Human iPSC Model
Source: Research Square preprint supplement (doi:10.21203/rs.3.rs-8022975/v1), 2025-12-11
Supplement: Supplementary file 2 [file 93906fe09be5cf88eff4659f.docx]

**Data online**

**Figure and Table Legends**

**Figure S1. Rhythm evolution in the proband following therapeutic interventions**. (**A**) Intracardiac electrophysiological recordings during radiofrequency ablation and electrical cardioversion. (**B**) Exemplary 12-lead electrocardiogram (ECG) documenting recurrent atrial fibrillation (AF) after ablation and cardioversion. (**C**) Restoration of sinus rhythm captured by 12-lead ECG following additional electrical cardioversion.

**Figure S2 ECG tracings from affected relatives in the AF kindred**. (**A**) Pedigree segment showing proband's maternal granduncle (II-6) and mother (III-12) (dashed arrow). (**B**-**C**) Baseline 12-lead ECGs from maternal granduncle (**B**) and mother (**C**). (**D**) Post-amiodarone ECG of mother (III-12) demonstrating treatment non-response and drug-induced QT prolongation.

**Table S1. Proband family Sanger sequencing results**

**Table S2. Clinical characteristics of familial atrial fibrillation (AF) kindreds.**

**Table S3. SeqTences of primers Tsed for gene amplification.**

**Table S4. Table S2 Antibodies for immunofluorescence (IF).**
