# Supplementary material for: Atrial-Specific KCNQ1 Channelopathy Drives Arrhythmogenesis and Unmasks Amiodarone Proarrhythmia in a Human iPSC Model
Source: Research Square preprint supplement (doi:10.21203/rs.3.rs-8022975/v1), 2025-12-11
Supplement: Supplementary file 3 [file 9fffab09582a73ef0b426261.docx]

**Table S 4 The antibodies for immunofluorescence (IF)**

| Name | Company | Catalogue number | Applications |
| --- | --- | --- | --- |
| Rabbit anti-OCT4 | Abcam | ab200834 | IF |
| Mouse anti-SSEA4 | Abcam | ab16287 | IF |
| Mouse anti-TRA-1-60 | BD Pharmingen | 560850 | IF |
| Mouse anti-TRA-1-81 | BD Pharmingen | 560793 | IF |
| Goat Anti-Rabbit IgG H&L (Alexa Fluor® 488) | Abcam | ab150077 | IF |
| Goat Anti-Mouse IgG H&L (Alexa Fluor® 488) | Abcam | ab150113 | IF |
| Goat Anti-Mouse IgG H&L (Alexa Fluor® 647) | Abcam | ab150115 | IF |
| Goat Anti-Rabbit IgG H&L (Alexa Fluor® 647) | Abcam | ab150079 | IF |
| ProLong™ Gold Antifade Mountant with DAPI | Thermo Fisher Scientific | D1306 | IF |
| Anti-Cardiac Troponin T antibody | Abcam | Ab45932 | IF、FCM |
| Monoclonal Anti-α-Actinin | Sigma-Aldrich | A7811 | IF |
| Hunan MYH6 Antibody | R&D | MAB8979 | IF、FCM |
| Hunan MYH7 Antibody | R&D | MAB9096 | IF |
