# Supplementary material for: Atrial-Specific KCNQ1 Channelopathy Drives Arrhythmogenesis and Unmasks Amiodarone Proarrhythmia in a Human iPSC Model
Source: Research Square preprint supplement (doi:10.21203/rs.3.rs-8022975/v1), 2025-12-11
Supplement: Supplementary file 4 [file a042f8658795ee3bdadac19e.docx]

**Table S1. Proband family Sanger sequencing results**
