# Supplementary material for: Atrial-Specific KCNQ1 Channelopathy Drives Arrhythmogenesis and Unmasks Amiodarone Proarrhythmia in a Human iPSC Model
Source: Research Square preprint supplement (doi:10.21203/rs.3.rs-8022975/v1), 2025-12-11
Supplement: Supplementary file 5 [file e32222852ed76730edbac998.docx]

**Table S2. Clinical characteristics of familial atrial fibrillation (AF) kindreds.**

| **Family**  **member** | **AF**  **phenotype** | **Age of**  **Onset (yrs)** | **AF treatment** | **LA and LV size** | **LVEF**  **(%)** |
| --- | --- | --- | --- | --- | --- |
| II:6 | Persistent | 35 | Drug refractory; currently on rate control therapy | LAE | 68 |
| III:2 | Persistent | 37 | Drug refractory;  currently on rate  control therapy | Normal | 65 |
| III:4 | Persistent | 40 | Drug refractory;  currently on rate  control therapy | LAE | 59 |
| III:10 | Persistent | 25 | Drug refractory;  currently on rate  control therapy | LAE | 35 |
| III:12 | Persistent | 43 | Drug refractory;  currently on rate  control therapy | Normal | 62 |
| III:19 | Paroxysmal | 42 | Successful PVI | LAE | 62 |
| IV:10 | Paroxysmal | 16 | Recurrence after PVI; Successful electrical cardioversion | Normal | 70 |

EF, ejection fraction; LAE, left atrial enlargement; LV left ventricular; PVI, pulmonary vein isolation.
